# Supplementary material for: Modulation of Antioxidant Defense, Immune Response, and Growth Performance by Inclusion of Propolis and Bee Pollen into Broiler Diets
Source: MDPI journal article supplement (doi:10.3390/ani12131658), 2022-06-28
Supplement: s1 [file s1]

**Table S1.** Antioxidants assay specification according to the colorimetric kits' manufacturer.

| Technical parameter    | TAC          | T-SOD       | CAT          |
|------------------------|--------------|-------------|--------------|
| Detection limits, U/mL | 0.62 – 145.2 | 1.35 – 62.0 | 0.27 – 155.4 |
| Sensitivity, U/mL      | 0.62         | 1.35        | 0.27         |
| Intra-assay CV%        | 2.7          | 5.1         | 3.1          |
| Inter-assay CV%        | 8.2          | 9.6         | 5.1          |

Abbreviations: TAC, total antioxidant capacity; T-SOD, total superoxide dismutase; CAT, catalase.
