# Supplementary material for: Modulation of Antioxidant Defense, Immune Response, and Growth Performance by Inclusion of Propolis and Bee Pollen into Broiler Diets
Source: MDPI journal article supplement (doi:10.3390/ani12131658), 2022-06-28
Supplement: s1 [file s1]

**Table S2.** Immunoglobulins (Ig) assay specification according to the ELISA kits' manufacturer.

| Technical parameter | IgA              | IgM              | IgG              |
|---------------------|------------------|------------------|------------------|
| Detection limits    | 12.5 – 400 ng/mL | 7.8 – 2000 ng/mL | 1.56 – 100 µg/mL |
| Sensitivity, U/mL   | 2.93 ng/mL       | 2 ng/mL          | 0.5 µg/mL        |
| Intra-assay CV%     | 10               | 8                | 8                |
| Inter-assay CV%     | 10               | 10               | 12               |
